# Supplementary material for: Depression Treatment Among Elderly Medicare Beneficiaries With Incident Cases of Cancer and Newly Diagnosed Depression
Source: Atypon-hosted journal article supplement (doi:10.1176/appi.ps.201600190), 2017-01-03
Supplement: appi.ps.201600190.ds001.pdf [file appi.ps.201600190.ds001.pdf]

**Appendix 1.1** Study Cohort Development Flow Diagram for Study Population of Elderly Medicare Beneficiaries Diagnosed with Incident Breast, Colorectal or Prostate cancer and Newly-diagnosed Depression

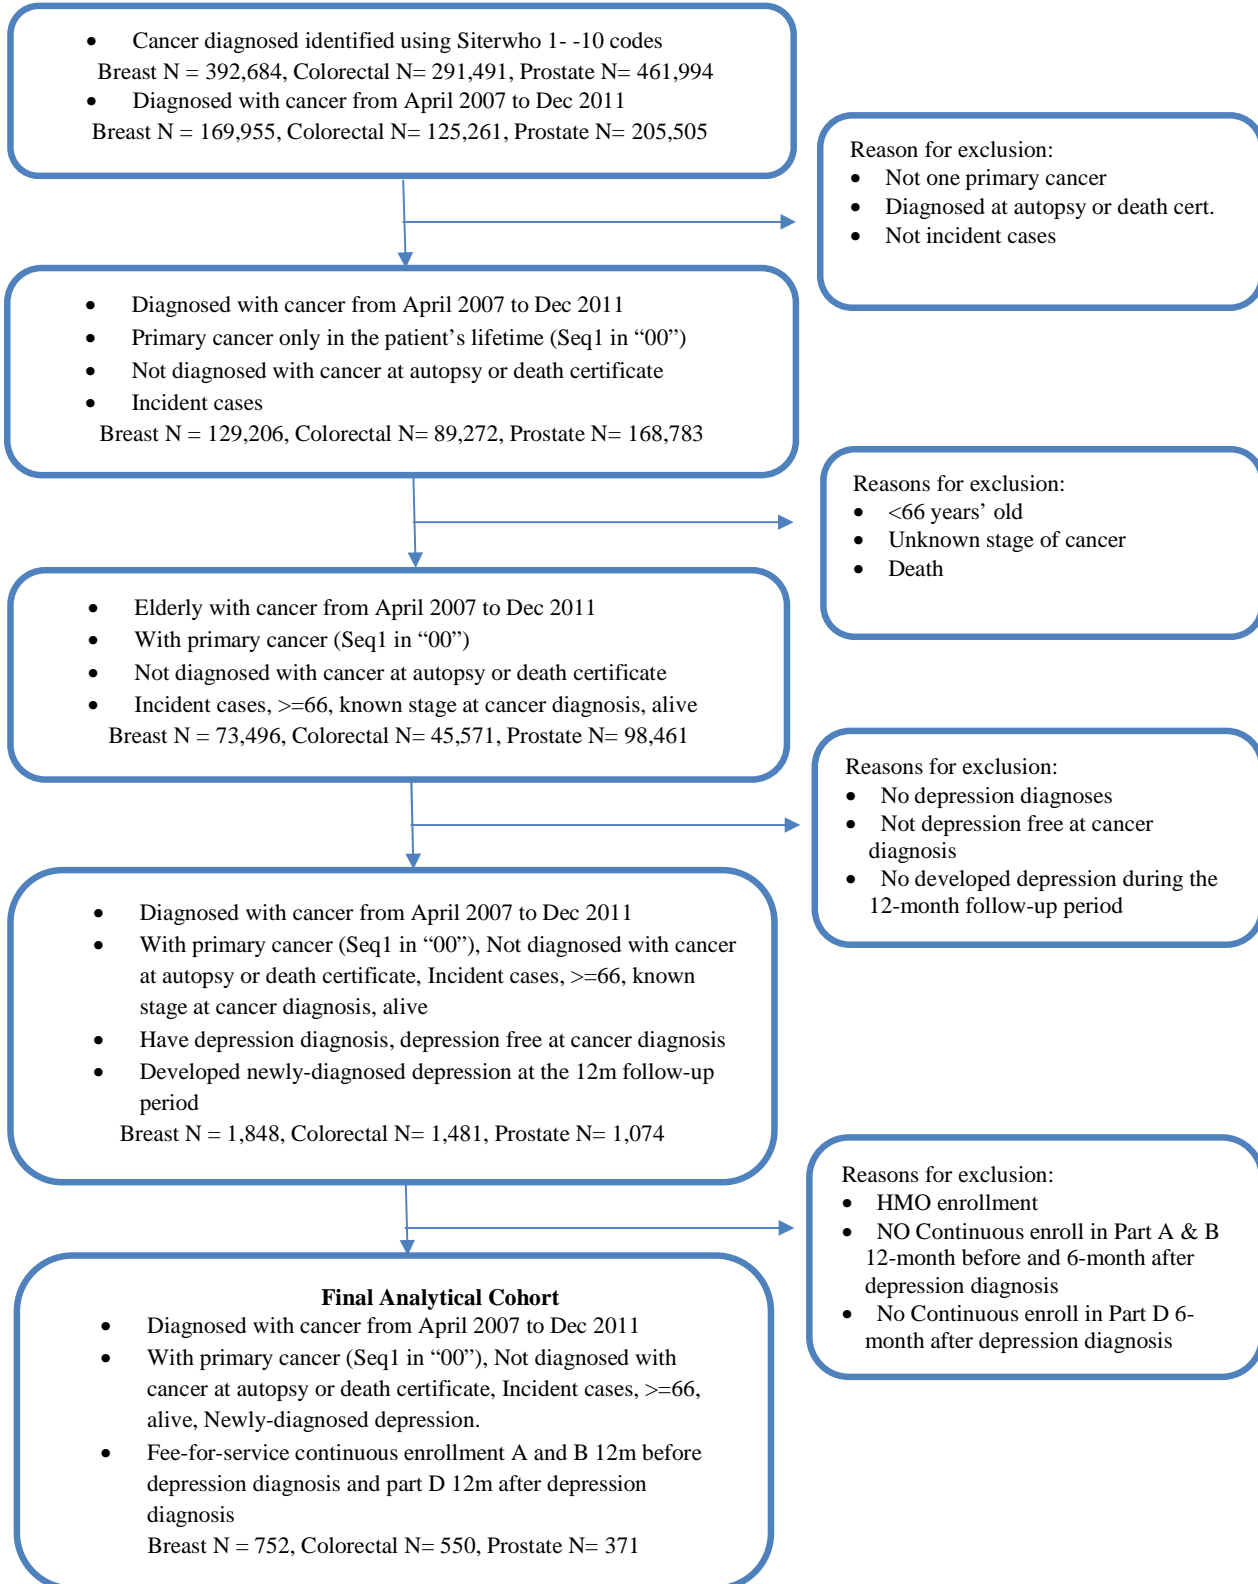

**Appendix 1.2**  
**Adjusted Odds Ratios and 95% Confidence Intervals of Depression Treatment Categories by**  
**Cancer Type**  
**from Multinomial Logistic Regression on Depression Treatment Categories**  
**Elderly Fee-for-service Medicare beneficiaries with Breast, Colorectal or Prostate Cancer**

**SEER-Medicare data from 2007-2012**

|                                              | <b>Antidepressants</b> |              | <b>Psychotherapy only</b> |              | <b>Combined AD/Psych</b> |              |
|----------------------------------------------|------------------------|--------------|---------------------------|--------------|--------------------------|--------------|
|                                              | <b>Only</b>            |              |                           |              |                          |              |
|                                              | <b>AOR</b>             | <b>95%CI</b> | <b>AOR</b>                | <b>95%CI</b> | <b>AOR</b>               | <b>95%CI</b> |
| <b>Reference Group = Women Breast Cancer</b> |                        |              |                           |              |                          |              |
| <b>Cancer types</b>                          |                        |              |                           |              |                          |              |
| Women Colorectal Cancer                      | .93                    | .67-1.29     | .97                       | .59-1.60     | .72                      | .47-1.09     |
| Men Colorectal Cancer                        | .87                    | .55-1.35     | 1.54                      | .81-2.95     | 1.04                     | .60-1.81     |
| Men Prostate Cancer                          | 1.10                   | .76-1.57     | 1.01                      | .56-1.82     | 1.17                     | .74-1.85     |
| <b>Reference Group = Men Prostate Cancer</b> |                        |              |                           |              |                          |              |
| Women Breast Cancer                          | .91                    | .64-1.31     | .99                       | .55-1.79     | .85                      | .54-1.35     |
| Women Colorectal Cancer                      | .85                    | .57-1.28     | .96                       | .51-1.81     | .61                      | .37-1.03     |
| Men Colorectal Cancer                        | .79                    | .48-1.30     | 1.53                      | .74-3.18     | .89                      | .48-1.65     |

Note: Based on 1,673 elderly fee-for-service Medicare beneficiaries with incident breast, Colorectal or prostate cancer and Newly-diagnosed depression who were continuously enrolled in Medicare Part A and B during the observation period and Part D during the follow-up period. Asterisks represent significant differences in study population characteristics by depression treatment categories, derived from multinomial logistic regression.

AD: Antidepressants; AOR: Adjusted odds ratio; CI: Confidence interval; Psych: Psychotherapy.
